# Supplementary material
Source: Springer Nature journal article supplement (https://www.springermedizin.de/resource/supplementary/12885_2009_1767_MOESM1_ESM.pdf/9472892)

## Mucinous Carcinoma Cases

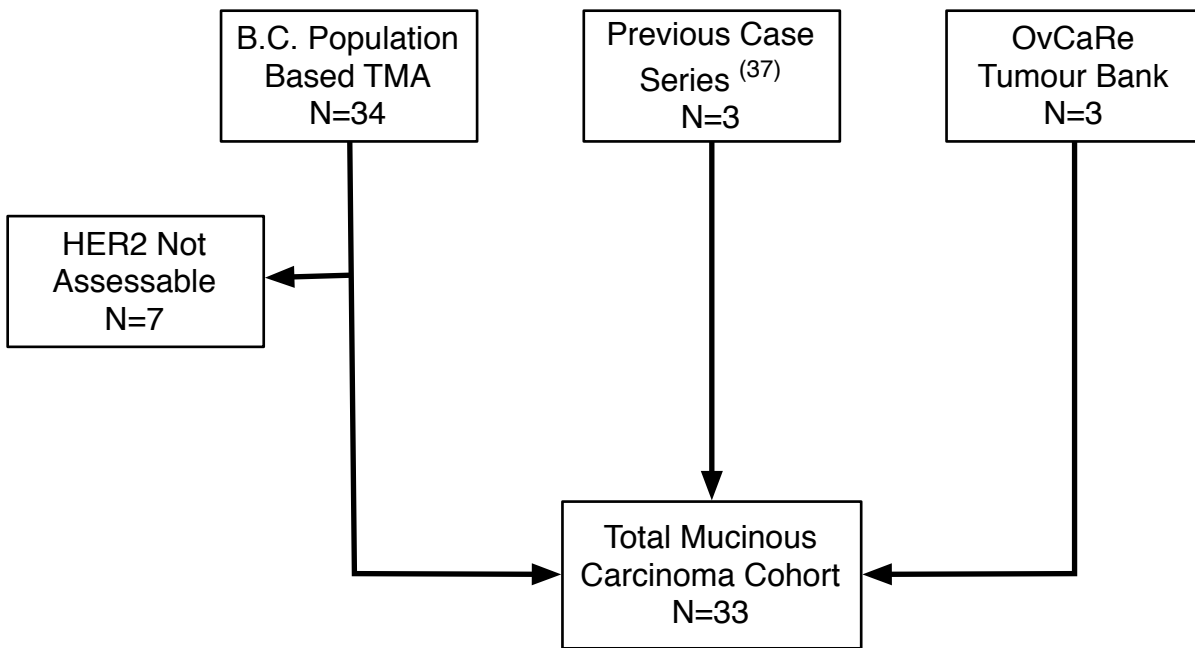

## Mucinous Borderline Cases

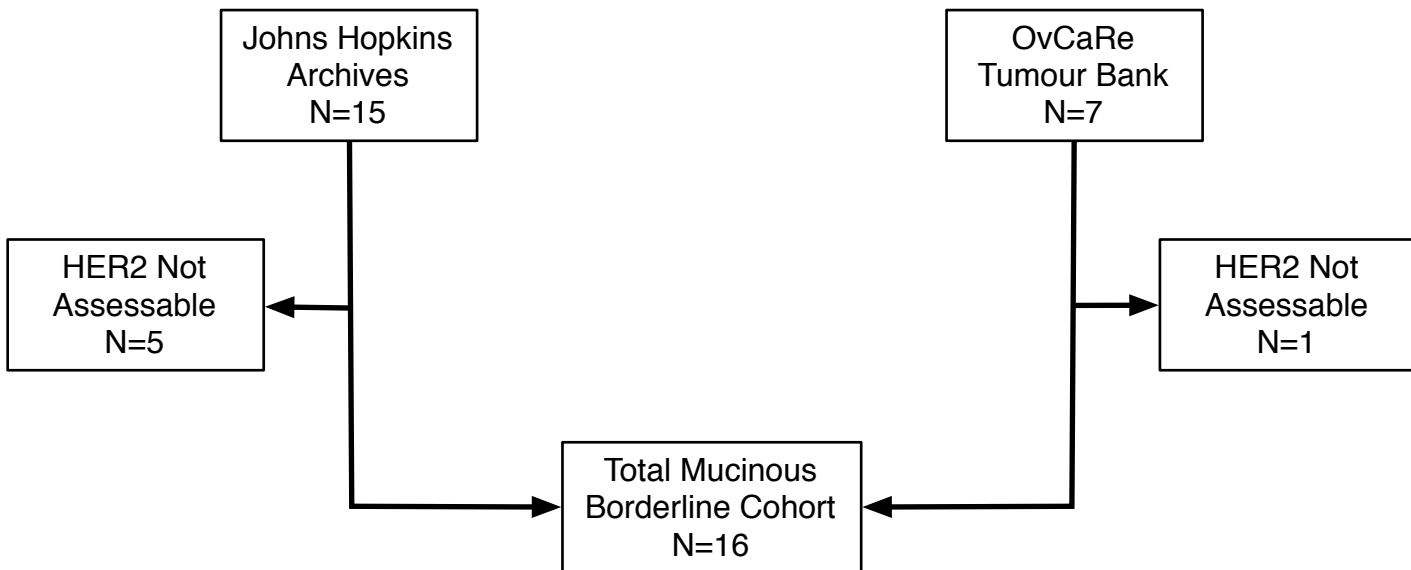

Supplement: MOESM1 [file 9472892]
